# Supplementary material for: Efficient photocatalytic hydrogen evolution: a novel multi-modified carbon nitride based on physical adsorption
Source: Royal Society of Chemistry journal article supplement (doi:10.1039/d3ta04906j), 2023-01-01
Supplement: d3ta04906j1.pdf [file d3ta04906j1.pdf]

## Supporting Information

Efficient photocatalytic hydrogen evolution: a novel multi-modified carbon nitride based on physical adsorption

Chaoyu Lv<sup>†a,b</sup>, Wei Li<sup>\*a,b</sup>, Qiawu Lin<sup>\*c</sup>, Huixing Yang<sup>a,b</sup>, Yangyang Jiang<sup>a,b</sup>, Yongzhuo Yu<sup>a,b</sup>, Yuxing Huang<sup>a,b</sup>

<sup>a</sup> Guangdong Provincial Key Laboratory of Quantum Engineering and Quantum Materials, Guangdong Engineering Technology Research Center of Efficient Green Energy and Environmental Protection Materials, School of Physics, School of Electronic and Information Engineering, South China Normal University, Guangzhou, 510006, PR China

<sup>b</sup> Guangdong Provincial Key Laboratory of Nuclear Science, South China Normal University, Guangzhou 510006, PR China

<sup>c</sup> School of Physics and Information Engineering, Guangdong University of Education, Guangzhou 510303, PR China

Corresponding author

\* E-mail address: tolwwt@163.com (W. Li)

1043107520@qq.com (Q.W. Lin)

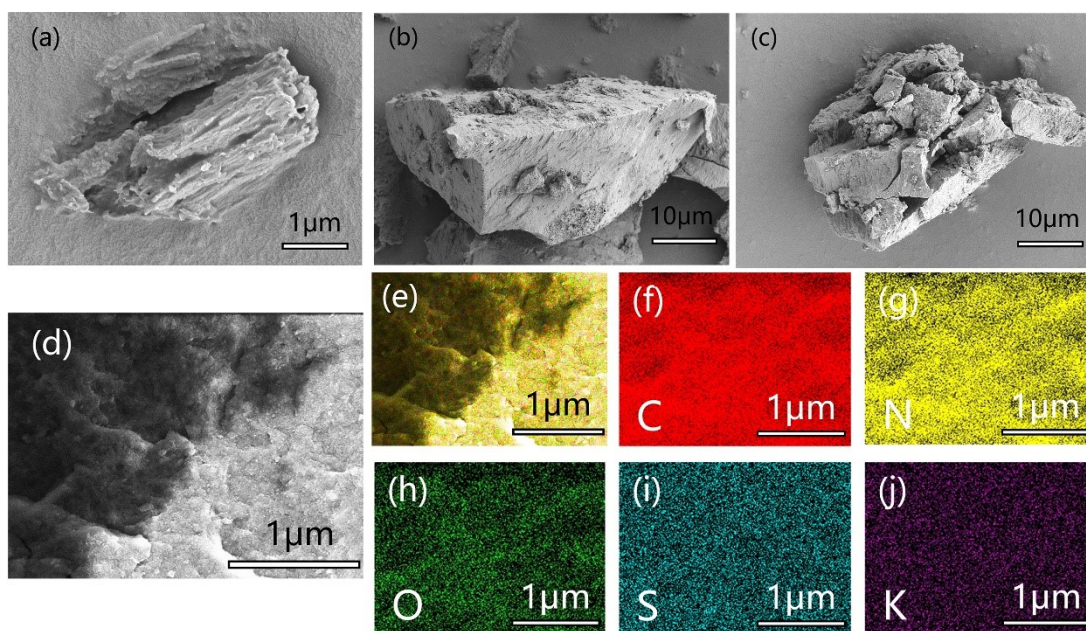

**Figure 1S.** SEM images of (a) g-C<sub>3</sub>N<sub>4</sub>, (b) c-C<sub>3</sub>N<sub>4</sub>, (c) b-C<sub>3</sub>N<sub>4</sub>, (d) measuring range of element distribution, (e) distribution of all elements, (f)~(j) the element distribution map of C, O, K, N, and S, respectively.

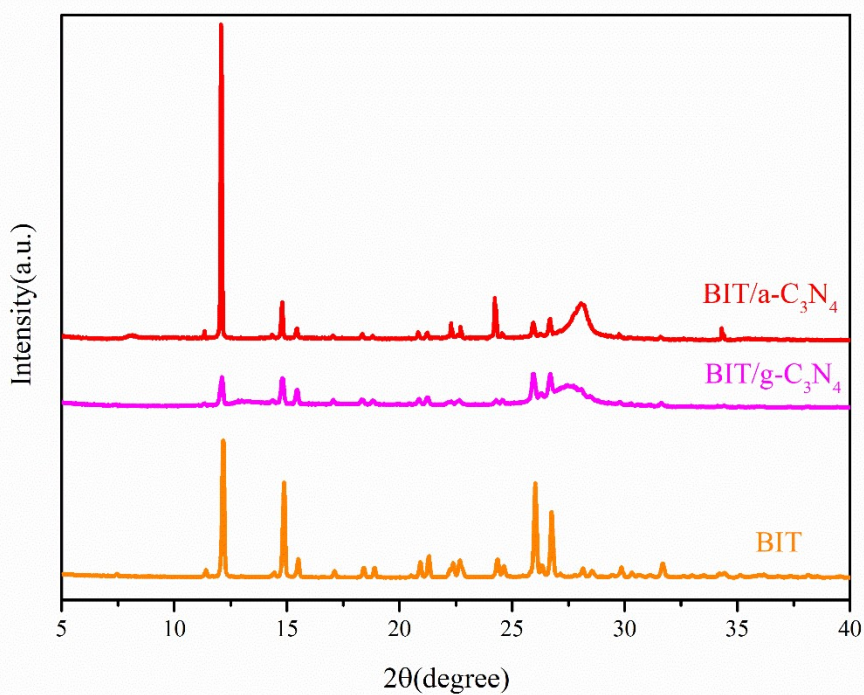

**Figure 2S.** XRD patterns of BIT/g-C<sub>3</sub>N<sub>4</sub>, BIT/a-C<sub>3</sub>N<sub>4</sub>, BIT.

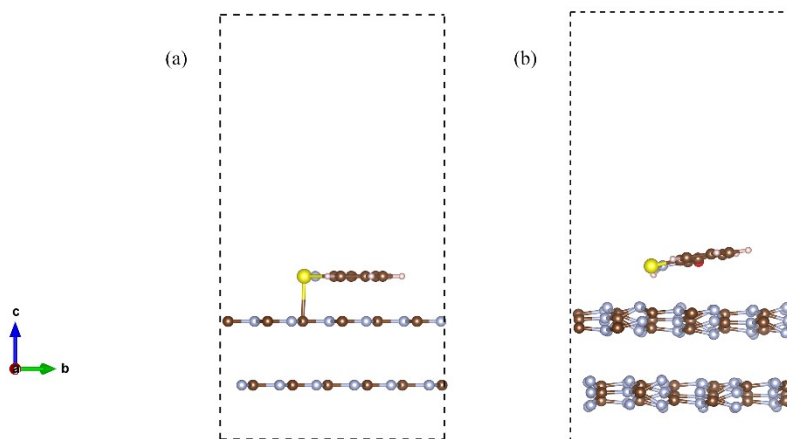

**Figure 3S.** Schematic of the model before (a) and after (b) DFT calculations (g-C<sub>3</sub>N<sub>4</sub>-SC-1).

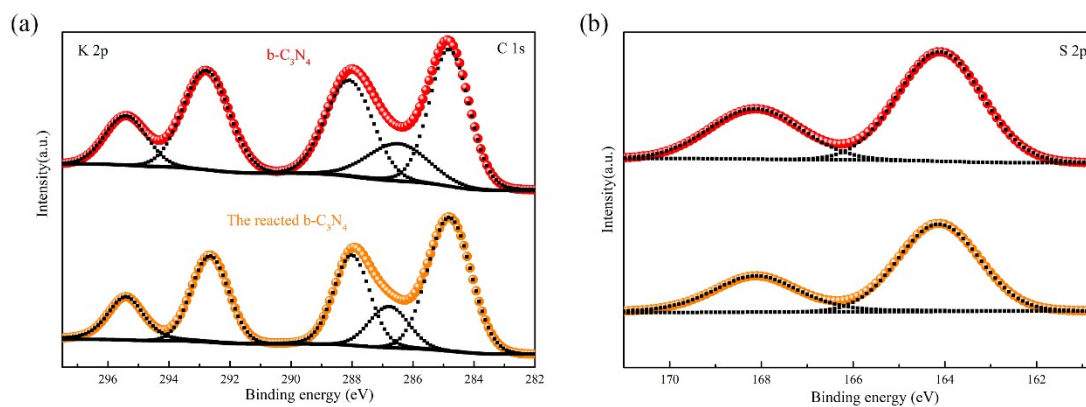

**Figure 4S.** XPS spectra of the fresh b-C<sub>3</sub>N<sub>4</sub> and the reacted b-C<sub>3</sub>N<sub>4</sub>.

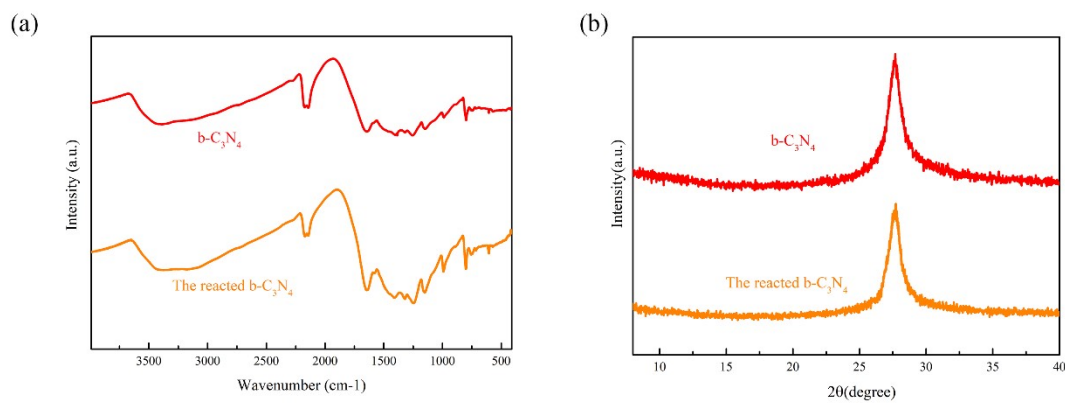

**Figure 5S.** (a) FTIR spectra and (b) XRD patterns of the fresh b-C<sub>3</sub>N<sub>4</sub> and the reacted b-C<sub>3</sub>N<sub>4</sub>.

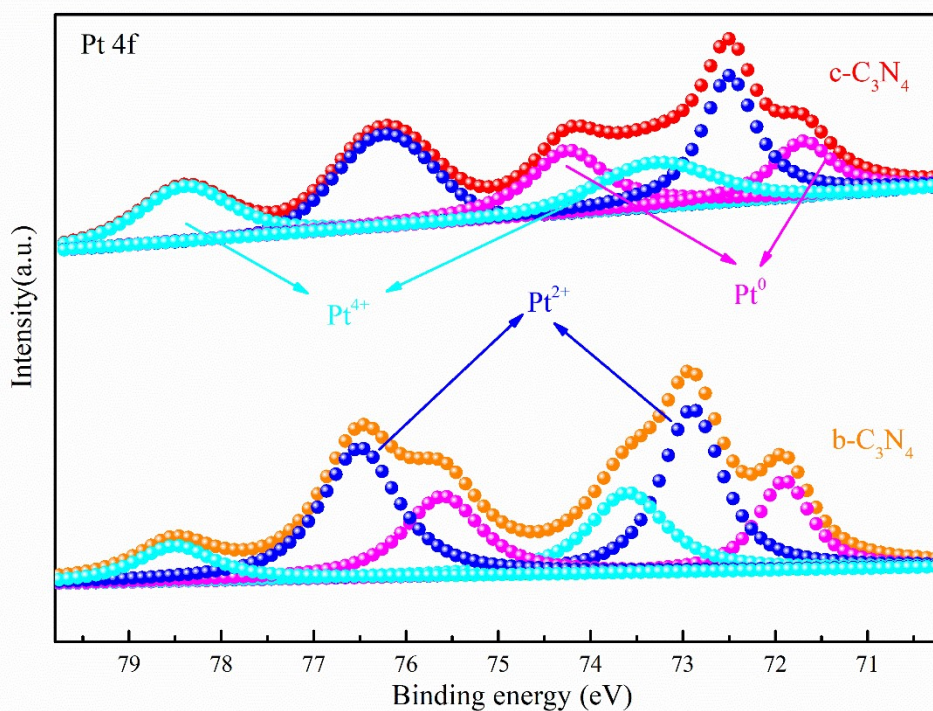

**Figure 6S.** XPS spectra of b-C<sub>3</sub>N<sub>4</sub> and c-C<sub>3</sub>N<sub>4</sub> after loading Pt.

**Table 1S.** Comparison of hydrogen production efficiency of b-C<sub>3</sub>N<sub>4</sub> with photocatalysts in other literature.

| Catalyst                                | Light Source                   | H <sub>2</sub> evolution and co-catalyst     | AQY   | Ref. |
|-----------------------------------------|--------------------------------|----------------------------------------------|-------|------|
| PhCN-5%                                 | 300 W Xenon lamp Visible light | 2.39 mmol/(g·h)<br>(1 wt% Pt, 20 vol% TEOA)  | 8.3%  | 1    |
| 0.2% BC/g-C <sub>3</sub> N <sub>4</sub> | 300 W Xenon lamp Visible light | 4.1 mmol/(g·h)<br>(1 wt% Pt, 10 vol% TEOA)   | —     | 2    |
| H-CN                                    | 300 W Xenon lamp Visible light | 4.3 mmol/(g·h)<br>(1 wt% Pt, 10 vol% TEOA)   | 3.03% | 3    |
| 2% NP/ g-C <sub>3</sub> N <sub>4</sub>  | 300 W Xenon lamp Visible light | 2.297 mmol/(g·h)<br>(3 wt% Pt, 10 vol% TEOA) | —     | 4    |
| PCNNVs-L                                | 300 W Xenon lamp Visible light | 10.3 mmol/(g·h)<br>(1 wt% Pt, 10 vol% TEOA)  | 3.5%  | 5    |
| P-CN 20%                                | 300 W Xenon lamp Visible light | 2.96 mmol/(g·h)<br>(1 wt% Pt, 20 vol% TEOA)  | —     | 6    |

|                                                                              |                                      |                                                 |      |           |
|------------------------------------------------------------------------------|--------------------------------------|-------------------------------------------------|------|-----------|
| 1% Yb <sub>2</sub> O <sub>3</sub> /g-C <sub>3</sub> N <sub>4</sub> -<br>CA·M | 300 W Xenon<br>lamp Visible<br>light | 4.072mmol/(g·h)<br>(1 wt% Pt, 9 vol% TEOA)      | 7%   | 7         |
| CN-PU                                                                        | 300 W Xenon<br>lamp Visible<br>light | 8.116 mmol/(g·h)<br>(3 wt% Pt, 10 vol% TEOA)    | 6.1% | 8         |
| b-C <sub>3</sub> N <sub>4</sub>                                              | 300 W Xenon<br>lamp Visible<br>light | 18.51 mmol/(g·h)<br>(3.75 wt% Pt, 10 vol% TEOA) | 8.9% | This work |

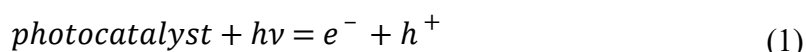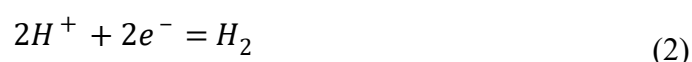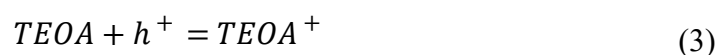

## References

- Cheng, J. S.; Li, C. M.; Yu, Z. Y.; Liu, H. X., Efficient photohydrogen production by edge-modified carbon nitride with nonmetallic group. *J. Colloid Interface Sci.* **2023**, *629*, 739-749.
- Lu, Y. F.; Wang, W. S.; Cheng, H. R.; Qiu, H. J.; Sun, W. H.; Fang, X.; Zhu, J. F.; Zheng, Y. H., Bamboo-charcoal-loaded graphitic carbon nitride for photocatalytic hydrogen evolution. *Int. J. Hydrog. Energy* **2022**, *47* (6), 3733-3740.
- Han, C. C.; Su, P. F.; Tan, B. H.; Ma, X. G.; Lv, H.; Huang, C. Y.; Wang, P.; Tong, Z. F.; Li, G.; Huang, Y. Z.; Liu, Z. F., Defective ultra-thin two-dimensional g-C<sub>3</sub>N<sub>4</sub> photocatalyst for enhanced photocatalytic H<sub>2</sub> evolution activity. *J. Colloid Interface Sci.* **2021**, *581*, 159-166.
- Li, L. L.; Bodedla, G. B.; Liu, Z. T.; Zhu, X. J., Naphthalimide-porphyrin hybridized graphitic carbon nitride for enhanced photocatalytic hydrogen production. *Appl. Surf. Sci.* **2020**, *499*, 8.
- Sun, X. H.; Shi, Y. X.; Lu, J. L.; Shi, W. L.; Guo, F., Template-free self-assembly of three-dimensional porous graphitic carbon nitride nanovesicles with size-dependent photocatalytic activity for hydrogen evolution. *Appl. Surf. Sci.* **2022**, *606*, 11.
- Yan, B.; Yang, G. W., Enhancing electron density of bulk g-C<sub>3</sub>N<sub>4</sub> through phosphorus doping for promoting photocatalytic hydrogen evolution reaction. *Appl. Surf. Sci.* **2021**, *570*, 8.
- He, Y. Z.; Chen, M. Z.; Jiang, Y.; Tang, L.; Yu, J. N.; Chen, Y.; Fu, M.; Tan, X. M.; Jing, J. J.; Zhang, G. Z.; Liu, X. Y., Tubular g-C<sub>3</sub>N<sub>4</sub> coupled with lanthanide oxides Yb<sub>2</sub>O<sub>3</sub> as a novel bifunctional photocatalyst: Enhanced photocatalytic NO removal and H<sub>2</sub> evolution, dual regulation and reaction pathway. *J. Alloy. Compd.* **2022**, *903*, 10.
- Li, J. X.; Wang, Y. H.; Li, X. C.; Gao, Q. Q.; Zhang, S. D., A facile synthesis of high-crystalline g-C<sub>3</sub>N<sub>4</sub> nanosheets with closed self-assembly strategy for enhanced photocatalytic H<sub>2</sub> evolution. *J. Alloy. Compd.* **2021**, *881*, 9.
